# Supplementary material for: Homotypic clustering of L1 and B1/Alu repeats compartmentalizes the 3D genome
Source: PubMed Central journal article supplement (PMC8169921; doi:10.1038/s41422-020-00466-6), 2021-01-29
Supplement: 41422_2020_466_MOESM2_ESM.pdf [file 41422_2020_466_MOESM2_ESM.pdf]

Fig. S2

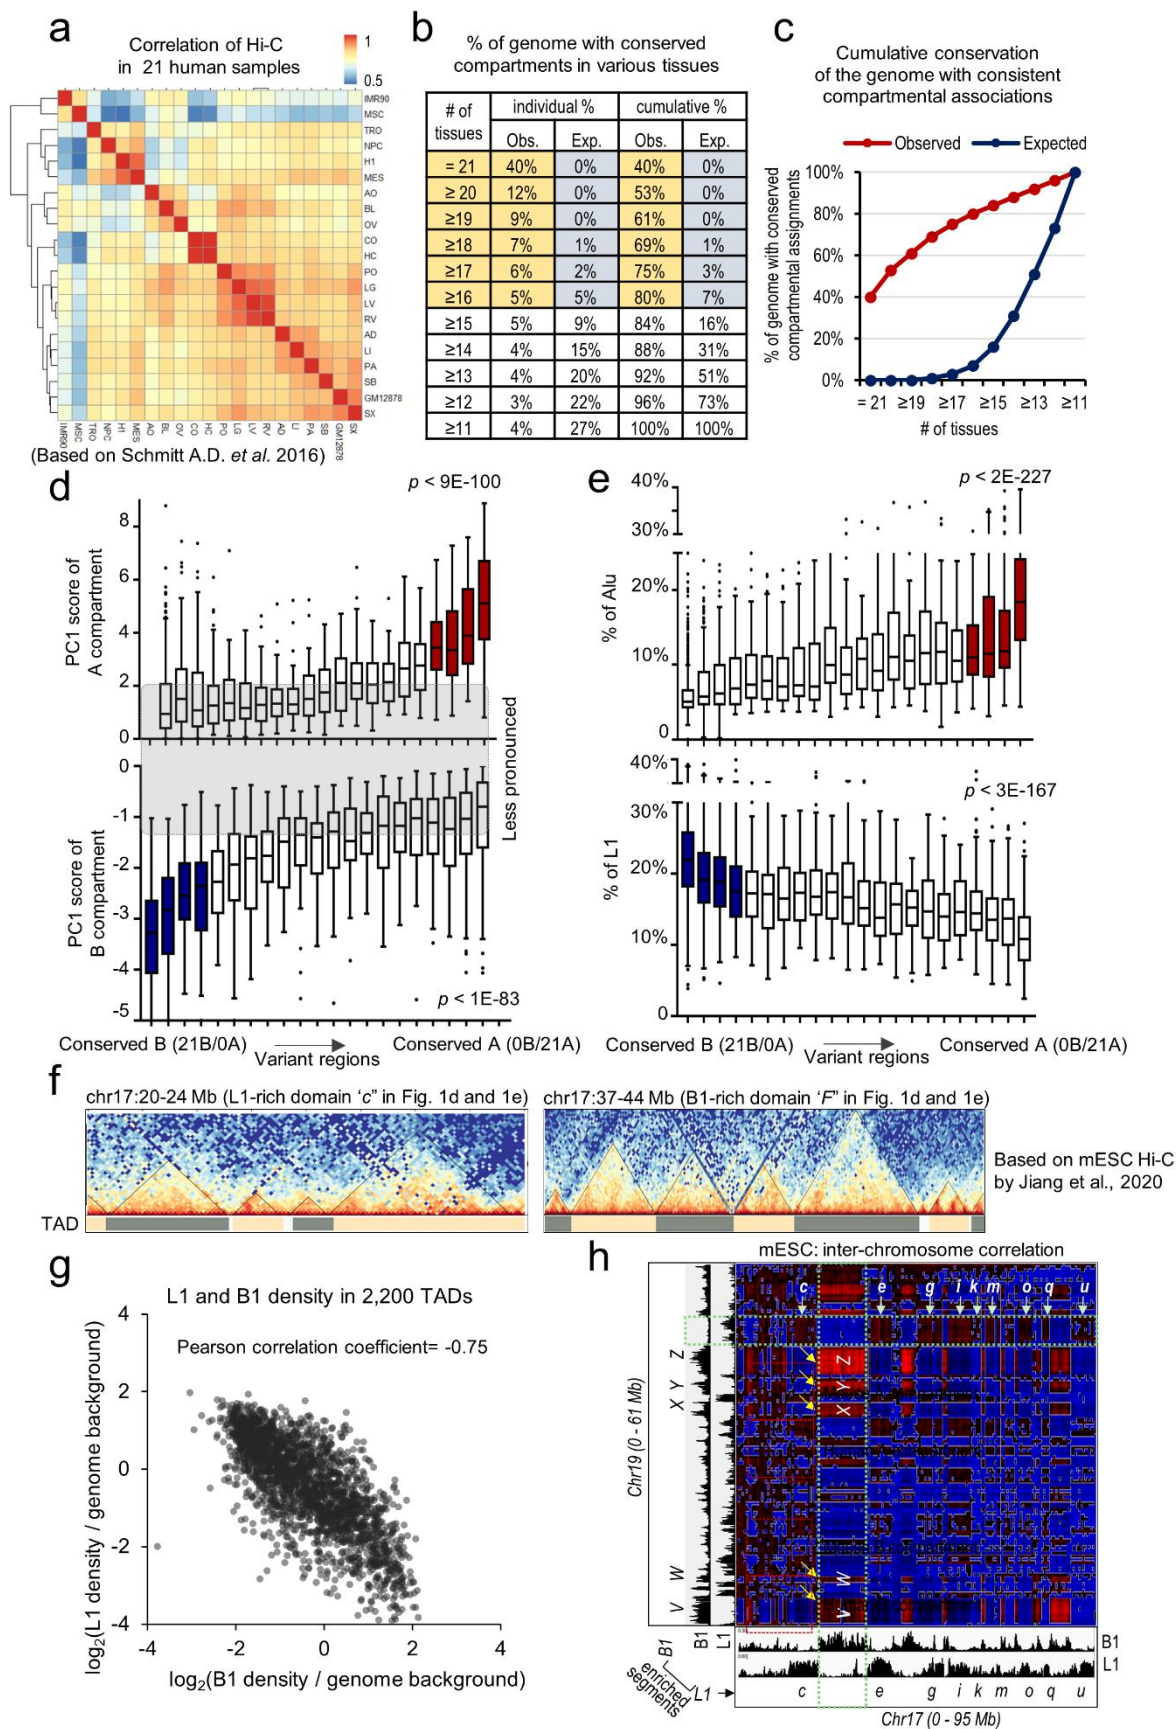

**Fig. S2 Conservation of compartmental organization across 21 human cell lines and tissues.**

(a-e) Analysis of compartmental conservation based on PC1 values of the Hi-C contact matrix in 21 human cell lines and tissues report by Schmitt *et al*<sup>1</sup>. PC1 values of Hi-C contact matrix were obtained from Table S2 of the previous report by Schmitt *et al*<sup>1</sup>.

- (a) Unsupervised hierarchical clustering of PC1 values of the Hi-C contact matrix in 21 human cell lines and tissues. Genomic positions of A/B compartments are highly similar across cell types, with an average Spearman correlation coefficient ranging 0.47-0.99 and a median value of 0.79.
- (b) Percentage of the human genome with conserved compartments in various numbers of tissues.
- (c) Cumulative conservation of the genome with consistent compartmental association based on panel (b).
- (d) Boxplot showing the PC1 values of genomic regions with different compartmental assignments by Hi-C. The y axis is the PC1 value of A (upper) or B (lower) compartments. The x axis shows genomic regions with various compartmental assignments that are sequentially arranged as 21B/0A, 20B/1A, 19B/2A, ..., 2B/19A, 1B/20A, 0B/21A from left to right. The label “21B/0A” or “0B/21A” means the genomic regions where all 21 samples have a compartment B or A label, respectively, thus representing the most conserved regions. The label “20B/1A” represents the genomic regions where 20 samples exhibit a compartment B label and 1 sample exhibit a compartment A label. The far left (for example, 21B/0A, 20B/1A, 19B/2A, and 18B/3A, highlighted in dark blue) and far right columns (for example, 3B/18A, 2B/19A, 1B/20A, and 0B/21A, highlighted in dark red) represent genomic regions with more conserved B or A compartmental assignment, respectively. The middle columns represent the genomic regions that tend to be more variant across different tissues and show less pronounced PC1 scores (arbitrarily defined based on *p* values; highlighted in grey). *p* values to the most conserved A and B (21B/0A and 0B/21A) are calculated with two-tailed Student’s *t*-test.
- (e) Boxplots showing the density of Alu (top) and L1 (bottom) in genomic regions with different compartmental assignments by Hi-C. Similar to (d), boxplots in the left and right regions represent genomic regions with conserved B and A compartment assignments, respectively, whereas the genomic regions in the middle tend to be more variant across different tissues. *p* values of conserved A and B are calculated with two-tailed Student’s *t*-test.
- (f) Heatmaps of B1-rich (chr17:20-24 Mb) and L1-rich (chr17: 37-44 Mb) regions, related to Fig. 1e. Annotated TADs are clearly illustrated and confirmed by the Hi-C contact heatmaps
- (g) Scatter plot showing distribution of L1 and B1 repeats in 2,200 TADs identified by Dixon *et al.*, 2012<sup>2</sup>.

(h) Correlation heatmap showing Pearson correlation coefficients of inter-chromosomal interaction frequencies between chromosomes 17 and 19 at 500-kb resolution. B1-rich regions on chr19 are arbitrarily labeled in uppercase as V, W, X, Y, and Z. L1-rich regions on chr17 are labeled as shown in panels (E-F) from *c*, *e* ... *q*, to *u*. The horizontal dotted box and arrows highlight positive correlations of an L1-rich region on chr19 with other L1-rich regions on chr17. The vertical dotted box and arrows show positive correlations of a B1-rich region on chr17 with other B1-rich regions on chr19.

#### References:

1. Schmitt, A. D. *et al.* A Compendium of Chromatin Contact Maps Reveals Spatially Active Regions in the Human Genome. *Cell Rep* **17**, 2042-2059, doi:10.1016/j.celrep.2016.10.061 (2016).
2. Dixon, J. R. *et al.* Topological domains in mammalian genomes identified by analysis of chromatin interactions. *Nature* **485**, 376-380, doi:10.1038/nature11082 (2012).
