# Supplementary material for: Homotypic clustering of L1 and B1/Alu repeats compartmentalizes the 3D genome
Source: PubMed Central journal article supplement (PMC8169921; doi:10.1038/s41422-020-00466-6), 2021-01-29
Supplement: 41422_2020_466_MOESM3_ESM.pdf [file 41422_2020_466_MOESM3_ESM.pdf]

Fig. S3

*De novo* compartment calling based on L1 and B1 DNA sequences

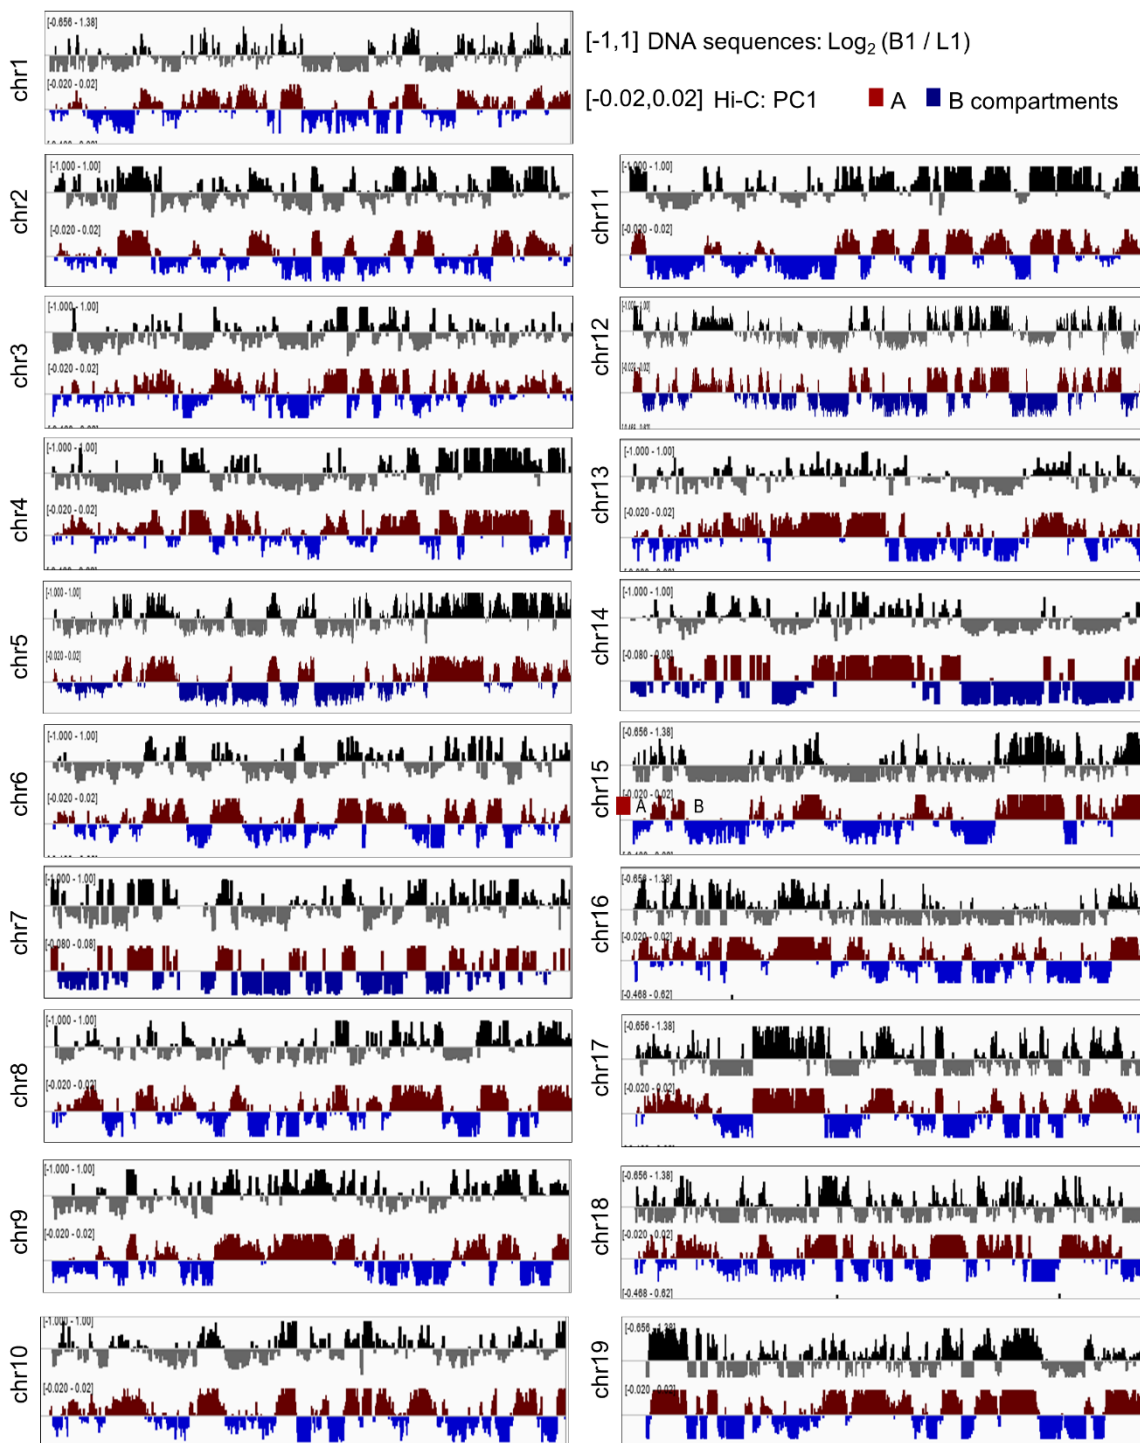

**Fig. S3 *De novo* compartment calling based on L1 and B1 DNA sequences.**

All mouse chromosomes showing the ratio of B1 to L1 density in  $\log_2$  scale [ $\log_2 (B1 / L1)$ ] (upper) and the PC1 score of Hi-C interaction matrix (lower) at 20-kb resolution.
