# Supplementary material for: Homotypic clustering of L1 and B1/Alu repeats compartmentalizes the 3D genome
Source: PubMed Central journal article supplement (PMC8169921; doi:10.1038/s41422-020-00466-6), 2021-01-29
Supplement: 41422_2020_466_MOESM4_ESM.pdf [file 41422_2020_466_MOESM4_ESM.pdf]

Fig. S4

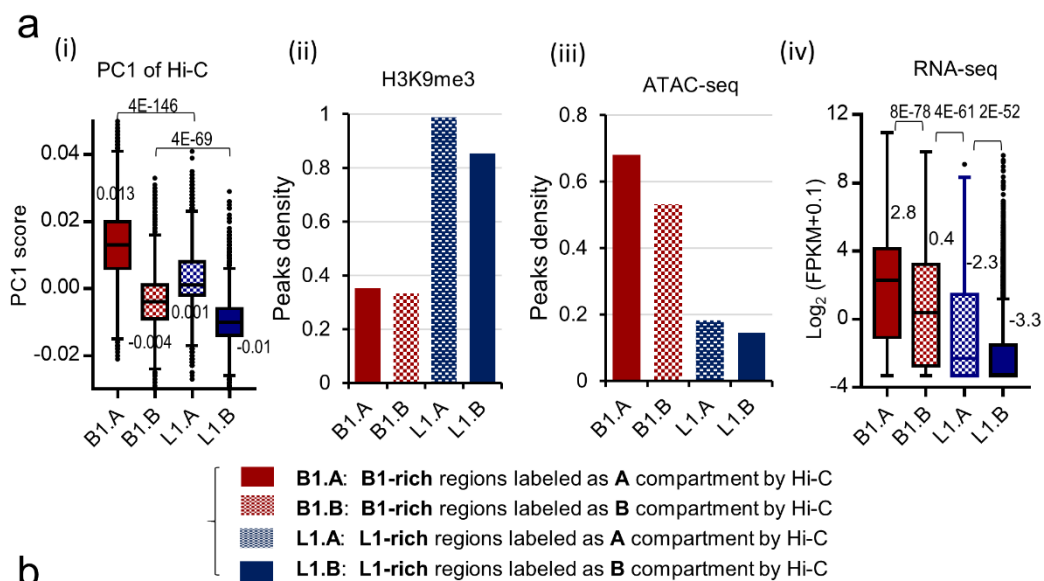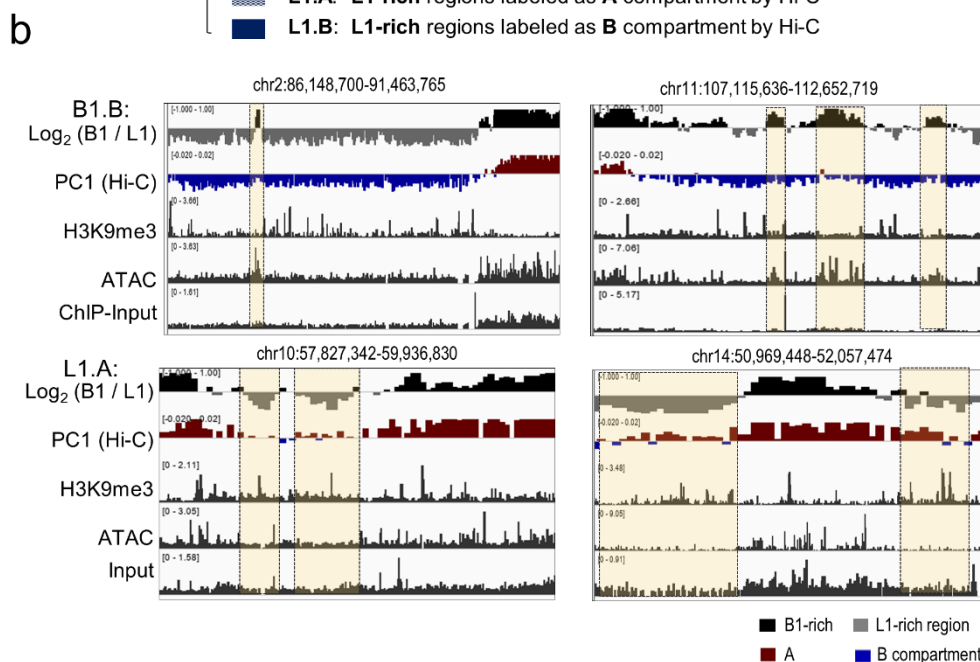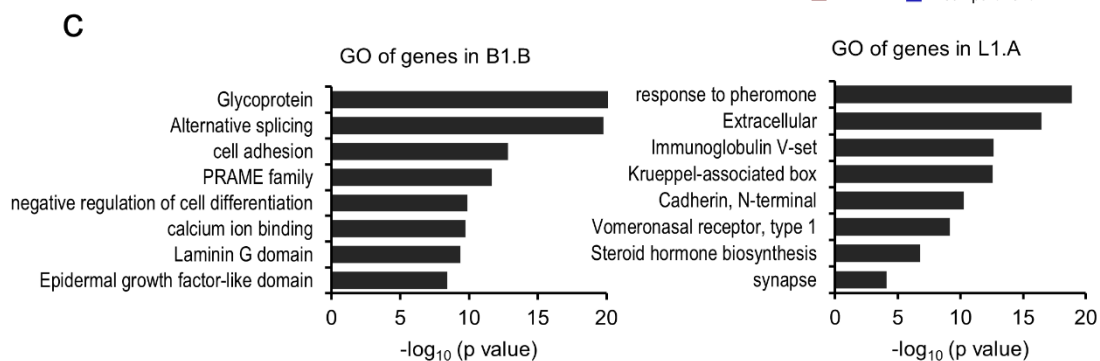

**Fig. S4 Sequence and chromatin features of genomic regions with consistent or inconsistent compartmental labeling.**

- (a) Chromatin features in four genomic regions with consistent or inconsistent compartmental labeling between *de novo* prediction and Hi-C. Genomic regions with consistent labeling include “B1.A” and “L1.B” which represent B1-rich or L1-rich regions that fall into Hi-C annotated A or B compartments, respectively. The inconsistently labeled regions include “B1.B” and “L1.A” which represent B1-rich or L1-rich regions that fall into Hi-C annotated B or A compartments, respectively. Boxplots in panel (i) show PC1 values of Hi-C interaction matrix in each group. Panels (ii) and (iii) show the peak densities of heterochromatic H3K9me3 mark and ATAC-seq. Boxplots in panel (iv) show the gene expression level in each group. *p* values are calculated with two-tailed Student’s *t*-test.
- (b) Representative genomic regions with inconsistent compartmental labeling between *de novo* prediction and Hi-C. Inconsistently labeled B1.B (upper) and L1.A (lower) regions are highlighted in yellow. They tend to have low PC1 values. B1.B regions tend to show high ATAC-seq signals. L1.A regions tend to show low ATAC-seq signals but high H3K9me3 signals.
- (c) Gene ontology analysis of genes in genomic regions with inconsistent compartmental labeling. Left: B1.B; Right: L1.A.
