# Supplementary material for: Homotypic clustering of L1 and B1/Alu repeats compartmentalizes the 3D genome
Source: PubMed Central journal article supplement (PMC8169921; doi:10.1038/s41422-020-00466-6), 2021-01-29
Supplement: 41422_2020_466_MOESM7_ESM.pdf [file 41422_2020_466_MOESM7_ESM.pdf]

Fig. S7

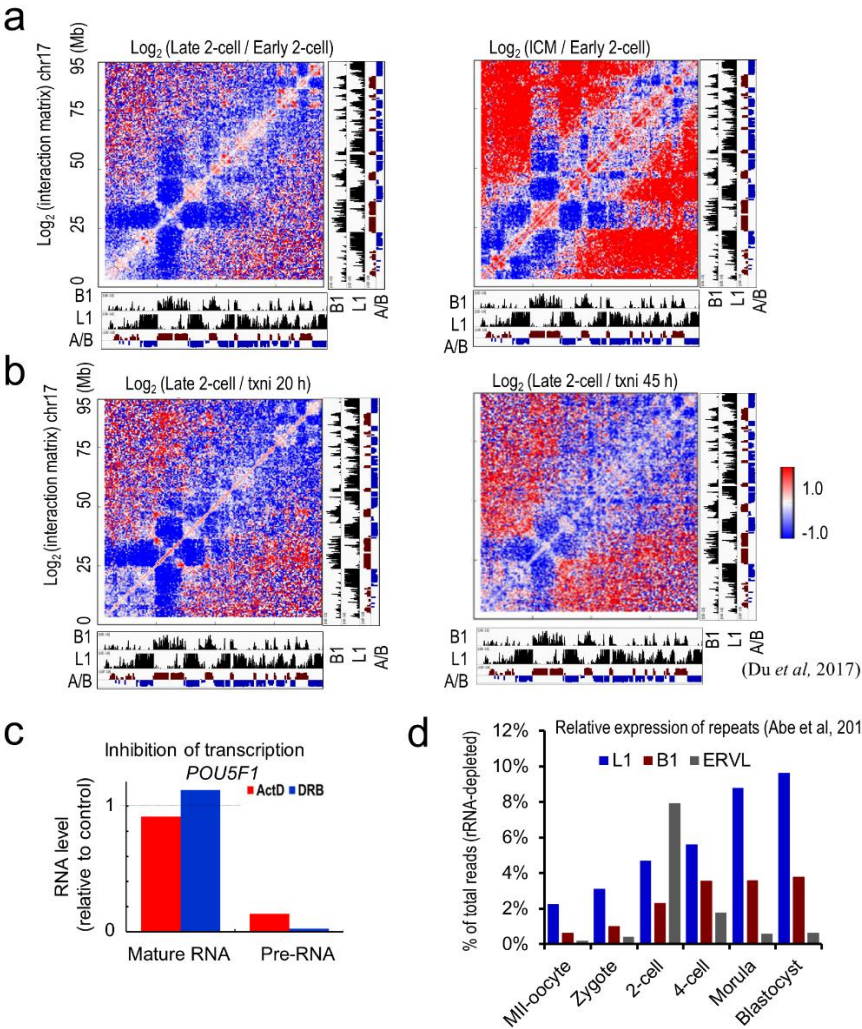

**Fig. S7 Dynamic establishment of higher-order chromatin organization during the early embryonic development.**

- (a) Heatmap showing comparisons of contact frequencies of late 2-cell embryos (left) and ICM (right) to early 2-cell embryos.
- (b) Heatmap showing comparisons of contact frequencies of late 2-cell embryos to embryos treated with the transcription inhibitor  $\alpha$ -amanitin for 20 hours (left) and 45 hours (right).
- (c) Relative expression of *POU5F1* mature RNA and pre-mRNA in mESCs after treatment with the transcription inhibitors DRB and ActD for 3 hours. Both drug treatments greatly reduced the level of *POU5F1* pre-mRNA, while the level of mature *POU5F1* mRNA was not obviously changed, demonstrating successful inhibition of transcription.
- (d) Relative expression of various repeats during embryogenesis. The y-axis represents the percentage of total reads in sequencing analysis of rRNA-depleted RNA collected from various stages of embryos based on Abe *et al.* (2015)<sup>3</sup>.

Reference

3. Abe, K. *et al.* The first murine zygotic transcription is promiscuous and uncoupled from splicing and 3' processing. *EMBO J* **34**, 1523-1537, doi:10.15252/emj.201490648 (2015).
