# Supplementary material for: Homotypic clustering of L1 and B1/Alu repeats compartmentalizes the 3D genome
Source: PubMed Central journal article supplement (PMC8169921; doi:10.1038/s41422-020-00466-6), 2021-01-29
Supplement: 41422_2020_466_MOESM9_ESM.pdf [file 41422_2020_466_MOESM9_ESM.pdf]

Fig. S9

a

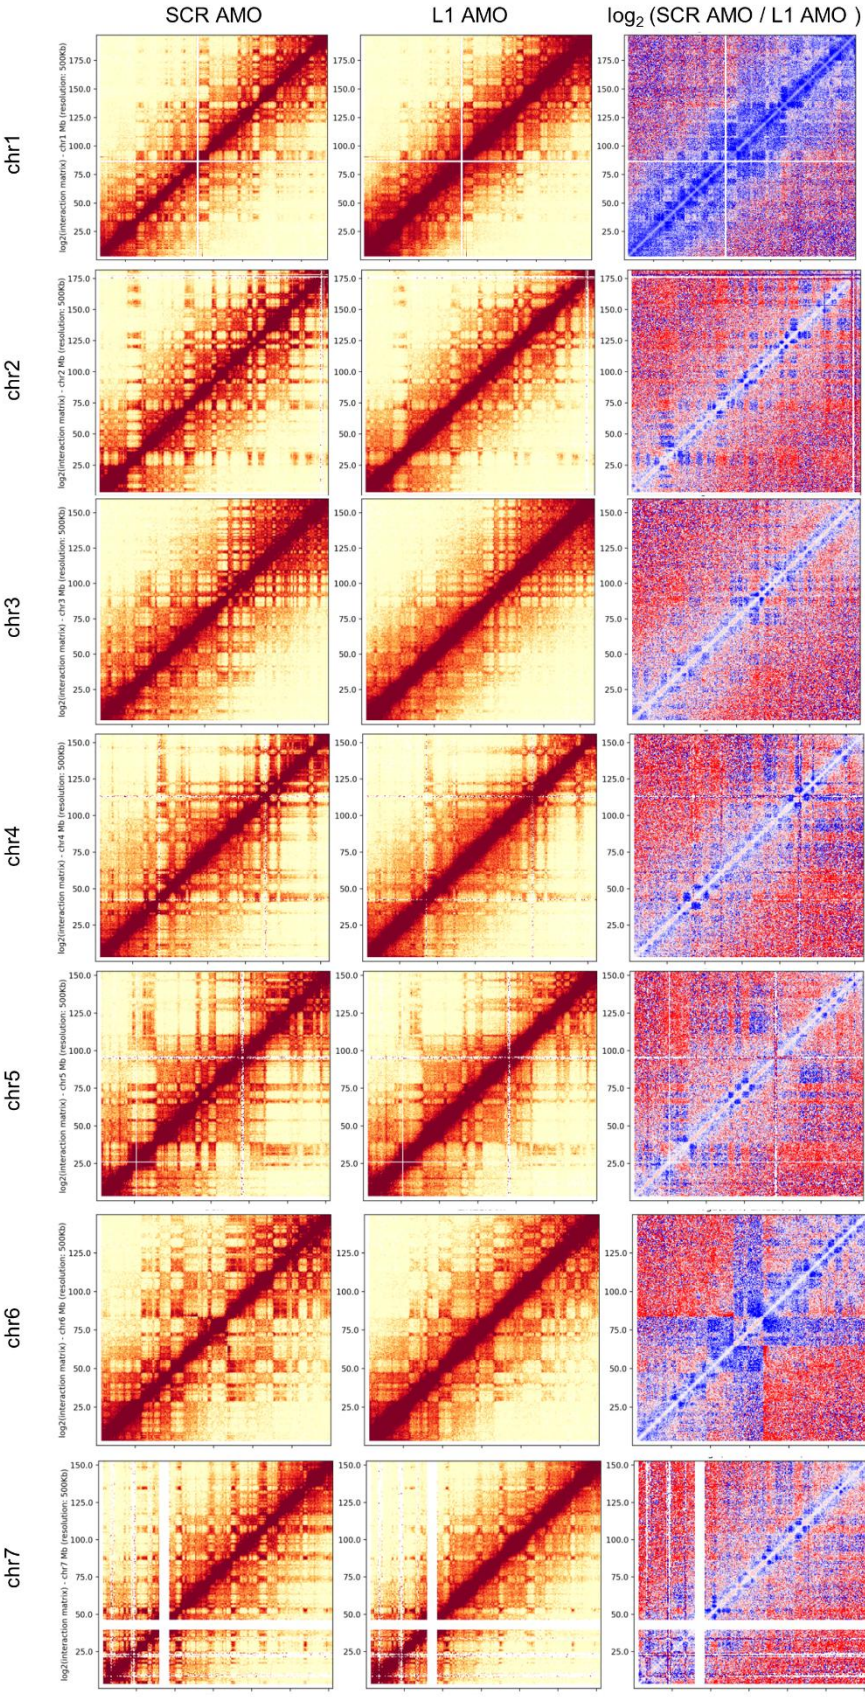

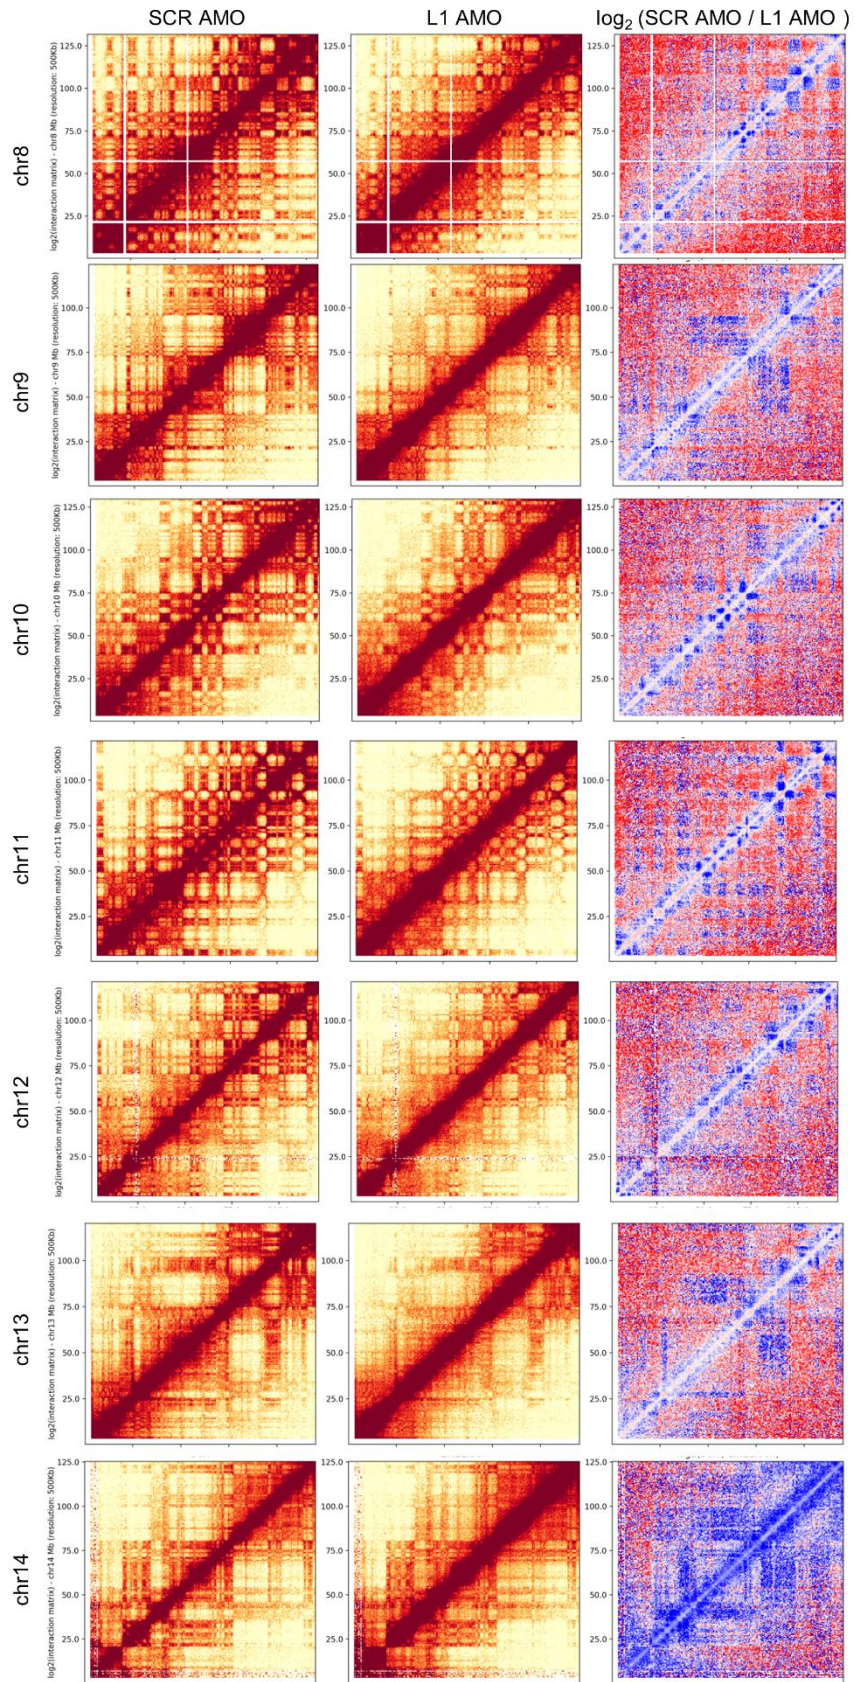

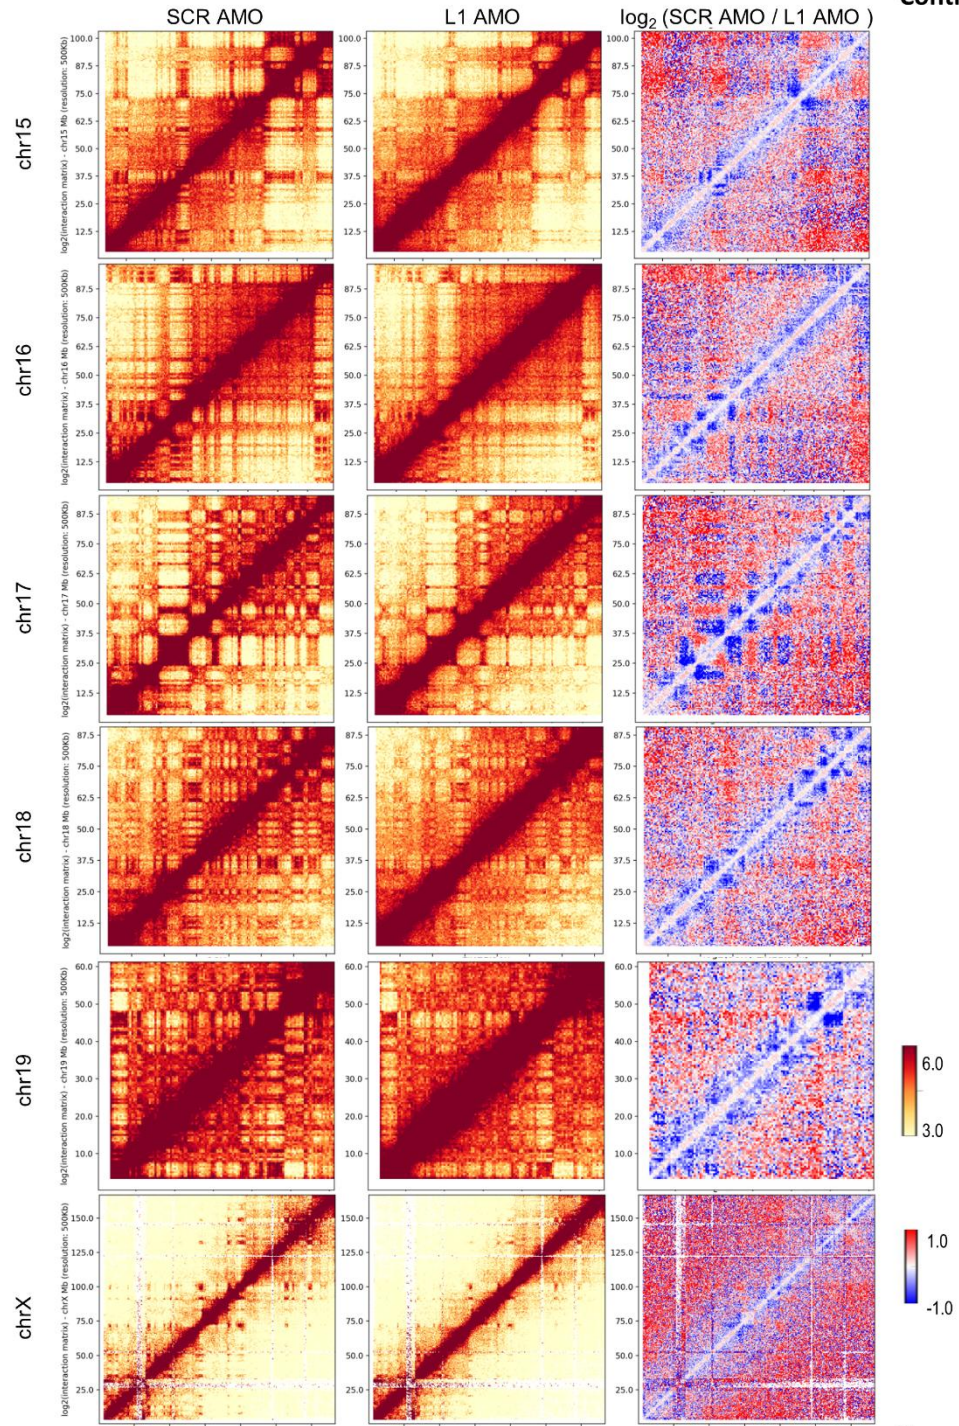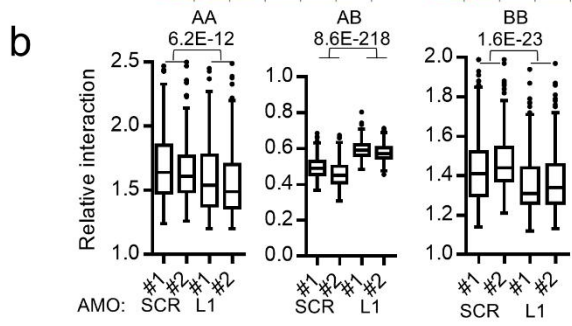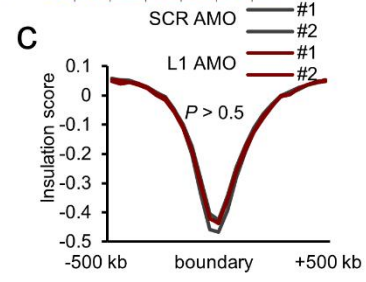

**Fig. S9 L1 RNA is required for the formation and maintenance of higher-order chromatin structure.**

- (a) Hi-C analysis of mESCs treated with scramble (SCR) and L1 AMOs for 36 hours (pooled data from 2 biological replicates). Hi-C heatmaps show the contact frequencies for SCR and L1 AMO and the comparison of contact frequencies between SCR and L1 AMOs [ $\log_2(\text{SCR}/\text{L1})$ ]. All chromosomes are shown at 500-kb resolution.
- (b) Analysis of compartment strength showing decreased compartmentalization in mESCs treated with L1 AMOs for 36 hours compared to SCR AMO. Boxplots of A-A, B-B, A-B interaction are shown. L1 AMO led to decreased A-A and B-B but increase of A-B interaction compared to SCR AMO. The  $p$  value was calculated by the two-tailed Student's  $t$ -test.
- (c) Metagene analysis of insulation scores around the TAD boundary in mESCs treated with L1 or SCR AMO. Two biological replicates are shown.
